# Supplementary material for: Can video streaming improve first aid for injured patients? A prospective observational study from Norway
Source: PubMed Central journal article supplement (PMC11131190; doi:10.1186/s12873-024-01010-0), 2024-05-28
Supplement: 12873_2024_1010_MOESM4_ESM.pdf [file 12873_2024_1010_MOESM4_ESM.pdf]

## Audio log data collection

### Mission number

Mission number for event

### Was video streaming used by dispatcher during the call?

Yes

No

Tried to use but did not work

### Does the dispatcher recognize that the patient has a need for first aid?

Relevant first aid measures are airway management, external bleeding control, recovery position and hypothermia prevention

Yes, and the caller has started to perform first aid

Yes, and the dispatcher asks the caller to perform first aid

No, need is not recognized, first aid measures are not performed (no measures are mentioned during the call),

The caller tells the dispatcher that they have started to perform first aid before the dispatcher has asked

Uncertain

### Time from call start with the caller until the dispatcher recognizes that the patient has a need for first aid.

*Dette elementet vises kun dersom alternativet «Yes, and the caller has started to perform first aid eller Yes, and the dispatcher asks the caller to perform first aid eller The caller tells the dispatcher that they have started to perform first aid before the dispatcher has asked» er valgt i spørsmålet «Does the dispatcher recognize that the patient has a need for first aid?»*

Measured from the first word in the sentence where the dispatcher asks the caller to take action OR asks if action has been taken OR the caller themselves says they have started action. Written as minutes:seconds

### Which first aid measures does the dispatcher recognize that the patient needs

Identified by the dispatcher asking if the action has been taken OR asking the caller to take the action OR the caller themselves stating that the action has been started. Evaluate for all four first aid measures

#### Airway management (e.g. jawlift)

Yes

No

Not relevant/not necessary

#### External bleeding control

Yes

No

Not relevant/not necessary

**Recovery position**

- Yes
- No
- Not relevant/not necessary

**Hypothermia prevention**

- Yes
- No
- Not relevant/not necessary

**Are any first aid measures performed by the public corrected by the AMK dispatcher during the call?**

The dispatcher asks the caller to correct one or more first aid measures. Evaluate for all four first aid measures

**Airway management (e.g. jawlift)**

- Yes
- No
- Not applicable, this measure was never attempted on the patient.

**External bleeding control**

- Yes
- No
- Not applicable, this measure was never attempted on the patient.

**Recovery position**

- Yes
- No
- Not applicable, this measure was never attempted on the patient.

**Hypothermia prevention**

- Yes
- No
- Not applicable, this measure was never attempted on the patient.

**Was the need for correction of the first aid measure recognized because of video?**

*Dette elementet vises kun dersom alternativet «Yes eller Tried to use but did not work» er valgt i spørsmålet «Was video streaming used by dispatcher during the call?»*

- Yes
- No
- Uncertain

**Free text field**

Enter if you think there is other important information that emerges from the conversation
