# Supplementary material for: Can video streaming improve first aid for injured patients? A prospective observational study from Norway
Source: PubMed Central journal article supplement (PMC11131190; doi:10.1186/s12873-024-01010-0), 2024-05-28
Supplement: 12873_2024_1010_MOESM5_ESM.pdf [file 12873_2024_1010_MOESM5_ESM.pdf]

## Data fra EMCC patient chart

### Mission number

Mission number for event

### Index-criteria

Index criteria for event. Written as e.g. A.08.04

### Social security number

Social security number for the patient

### Date of the call

Written as dd.mm.yyyy

### Time of day the call is answered

Written as hh:mm:ss

### Geographic location for event

Closest specific place that can be retrieved from chart

### Is video streaming recorded as used?

As a separate measure or described in the free text field

Yes

No

### Resources on site

Which and how many resources were alerted about the incident?

#### Ambulance

0

1

2

3

#### Physician

0

1

2

3

#### Air ambulance

0

1

2

3

**Ambulance boat**

0

1

2

3

**Single paramedic unit**

0

1

2

3

**ATV/snowmobile**

0

1

2

3

**Ski patrol**

0

1

2

3

**First aid responder**

0

1

2

3

**Delivery location for patient**

Hospital

Out-of-hours emergency clinic

GP office

The patient was asked to use own transport/or no need for follow-up

The patient does not wish to go with the ambulance

Deceased

**Time of activation of first resource**

Written as hh:mm:ss

**Time the first resource arrived at the scene**

Written as hh:mm:ss

**Time the first resource departed**

Written as hh:mm:ss

**Time the patient is delivered at the destination**

Written as hh:mm:ss. If the patient does not get transport from the emergency services, write 00:00:00

**Free text fiels**

Other relevant information from chart about first aid or video streaming
